# Supplementary material
Source: PubMed Central journal article supplement (PMC3659981)
Supplement: supp_2012.070235_2012_070235-Contributions.pdf [file supp_2012.070235_2012_070235-Contributions.pdf]

*Manuscript no. HAEMATOL2012/070235 entitled “Influence of molecular subgroups on outcome of acute myeloid leukemia with normal karyotype in 141 patients undergoing salvage allogeneic stem cell transplantation in primary induction failure or beyond first relapse”*

*Authors: Tim Pfeiffer, Michael Schleuning, Jiri Mayer, Karl-Heinz Haude, Johanna Tischer, Stefanie Buchholz, Donald Bunjes, Gesine Bug, Ernst Holler, Ralf G. Meyer, Hildegard Greinix, Christof Scheid, Maximilian Christopeit, Susanne Schnittger, Jan Braess, Günther Schlimok, Karsten Spiekermann, Arnold Ganser, Hans-Jochem Kolb, and Christoph Schmid*

**Information about the contributions of each person named as having participated in the study**

**1) Guarantor(s), i.e., person(s) who is (are) responsible for the integrity of the work as a whole:**

- Christoph Schmid, Dpt. of Medicine II, Klinikum Augsburg, Christoph.Schmid@klinikum-augsburg.de

According to the International Committee of Medical Journal Editors (ICMJE) ([http://www.icmje.org/ethical\\_1author.html](http://www.icmje.org/ethical_1author.html)): “Authorship credit should be based on: 1) substantial contributions to conception and design, acquisition of data, or analysis and interpretation of data; 2) drafting the article or revising it critically for important intellectual content; and 3) final approval of the version to be published. Authors should meet conditions 1, 2, and 3 ..... Acquisition of funding, collection of data, or general supervision of the research group alone does not constitute authorship”.

The guarantors of this manuscript confirm that all persons designated as authors qualify for authorship, and that each author has participated sufficiently in the work to take public responsibility for appropriate portions of the content.

**2) Authors who participated in the conception of the study:**

- Tim Pfeiffer, Michael Schleuning, Günther Schlimok, Hans-Jochem Kolb, and Christoph Schmid

**3) Design & Methods. The following authors were responsible for specific investigations:**

- Tim Pfeiffer and Christoph Schmid were mainly responsible for data acquisition and analysis
- Michael Schleuning, Jiri Mayer, Johanna Tischer, Stefanie Buchholz, Donald Bunjes, Gesine Bug, Ernst Holler, Ralf G. Meyer, Hildegard Greinix, Christof Scheid, Maximilian Christopeit, and Arnold Ganser were responsible for the recruiting of patients and treatment according to the protocol, for proper reporting of the data into the registry and for ensuring particular accuracy of molecular data by personally reviewing patient charts and acquisition of original molecular reports
- Karl-Heinz Haude performed cumulative incidence plots and calculation of time-dependent variables
- Susanne Schnittger, Jan Braess and Karsten Spiekermann performed morphologic, cytogenetic and molecular analysis of AML samples and were responsible for correct reporting on cytogenetic and molecular data

**4) Results. The following authors were responsible for specific portions of the results, including figures and tables:**

- Overall results, figure 1+3, Table 1-3: Tim Pfeiffer and Christoph Schmid

- Figure 2: Karl-Heinz Haude

**5) Writing the manuscript. The following authors were responsible for writing the manuscript:**

- Tim Pfeiffer and Christoph Schmid were responsible for writing the primary version of the manuscript. All authors critically reviewed the original and also the revised version and gave substantial input to both form and content, In particular, interpretation of the reported data was performed on the basis of intensive discussion among all authors. All authors gave consent to the final draft

**6) Contributors Listed in Acknowledgments:**

The following data managers provided assistance in data acquisition: Elke Dammann, Hannover, Karin David, Wiesbaden, A. Franke, C. Lallinger and M. Rothmeyer, Munich, and A. Bader, Augsburg.
